# Supplementary material for: One million dog vaccinations recorded on mHealth innovation used to direct teams in numerous rabies control campaigns
Source: PubMed Central journal article supplement (PMC6062050; doi:10.1371/journal.pone.0200942), 2018-07-26
Supplement: pone.0200942.s003.pdf [file pone.0200942.s003.pdf]

## Supporting Information 1

**SI 1: Table of common data entry fields included in customised forms for different categories of work**

| Vaccination Form                                                                                                                                                                                                                                                                                                                                                                                                                                                                                                                                                                                                                                                                                                                                                                                                                                                                                                                                                                                                                              | Post-Vaccination Survey Form                                                                                                                                                                                                                                                                                                                                                                                                                                                                                                     | Education Record Form                                                                                                                                                                                                                                                                                                                                                                                                                                                                                                                                                                                                                                                                                                                        | Rabies Response Form                                                                                                                                                                                                                                                                                                                                                                                                                                                                                                                                                                            |
|-----------------------------------------------------------------------------------------------------------------------------------------------------------------------------------------------------------------------------------------------------------------------------------------------------------------------------------------------------------------------------------------------------------------------------------------------------------------------------------------------------------------------------------------------------------------------------------------------------------------------------------------------------------------------------------------------------------------------------------------------------------------------------------------------------------------------------------------------------------------------------------------------------------------------------------------------------------------------------------------------------------------------------------------------|----------------------------------------------------------------------------------------------------------------------------------------------------------------------------------------------------------------------------------------------------------------------------------------------------------------------------------------------------------------------------------------------------------------------------------------------------------------------------------------------------------------------------------|----------------------------------------------------------------------------------------------------------------------------------------------------------------------------------------------------------------------------------------------------------------------------------------------------------------------------------------------------------------------------------------------------------------------------------------------------------------------------------------------------------------------------------------------------------------------------------------------------------------------------------------------------------------------------------------------------------------------------------------------|-------------------------------------------------------------------------------------------------------------------------------------------------------------------------------------------------------------------------------------------------------------------------------------------------------------------------------------------------------------------------------------------------------------------------------------------------------------------------------------------------------------------------------------------------------------------------------------------------|
| <ul style="list-style-type: none"> <li>• Action               <ul style="list-style-type: none"> <li>- Vaccinated</li> <li>- Already vaccinated</li> <li>- Not vaccinated</li> </ul> </li> <li>• Sex               <ul style="list-style-type: none"> <li>- Male</li> <li>- Female lactating</li> <li>- Female non-lactating</li> <li>- Unknown</li> </ul> </li> <li>• Age               <ul style="list-style-type: none"> <li>- Adult (&gt;3months)</li> <li>- Puppy (&lt;3months)</li> </ul> </li> <li>• Ownership               <ul style="list-style-type: none"> <li>- Owned</li> <li>- Stray</li> </ul> </li> <li>• Confinement               <ul style="list-style-type: none"> <li>- Roaming</li> <li>- Confined</li> </ul> </li> <li>• Neuter status               <ul style="list-style-type: none"> <li>- Entire</li> <li>- Neutered</li> <li>- Unknown</li> </ul> </li> <li>• Health status               <ul style="list-style-type: none"> <li>- Healthy</li> <li>- Sick or injured</li> </ul> </li> <li>• Comments</li> </ul> | <ul style="list-style-type: none"> <li>• Vaccination status               <ul style="list-style-type: none"> <li>- Mark present</li> <li>- Mark absent</li> </ul> </li> <li>• Sex               <ul style="list-style-type: none"> <li>- Adult male</li> <li>- Adult non-lactating female</li> <li>- Adult lactating female</li> <li>- Puppy</li> <li>- Unknown</li> </ul> </li> <li>• Neuter status               <ul style="list-style-type: none"> <li>- Entire</li> <li>- Neutered</li> <li>- Unknown</li> </ul> </li> </ul> | <ul style="list-style-type: none"> <li>• School name</li> <li>• Type of school               <ul style="list-style-type: none"> <li>- Primary</li> <li>- Secondary</li> <li>- High School</li> </ul> </li> <li>• Grades taught in school</li> <li>• Total number of children in school</li> <li>• Grades rabies educated</li> <li>• Number of children rabies educated</li> <li>• Class delivered               <ul style="list-style-type: none"> <li>- Single classes</li> <li>- Group classes</li> <li>- Assembly</li> <li>- Other (describe)</li> </ul> </li> <li>• Activities conducted               <ul style="list-style-type: none"> <li>- Presentation</li> <li>- Quiz</li> <li>- Drama</li> </ul> </li> <li>• Comments</li> </ul> | <ul style="list-style-type: none"> <li>• History</li> <li>• Clinical signs</li> <li>• Ownership status               <ul style="list-style-type: none"> <li>- Owned</li> <li>- Stray</li> </ul> </li> <li>• Confinement               <ul style="list-style-type: none"> <li>- Roaming</li> <li>- Confined</li> </ul> </li> <li>• Number of people bitten</li> <li>• Number/type of animals bitten</li> <li>• Outcome               <ul style="list-style-type: none"> <li>- Dog not caught</li> <li>- Home quarantine</li> <li>- Dog removed</li> <li>- Dead on arrival</li> </ul> </li> </ul> |
